# Supplementary material for: Comprehensive Transcriptomic Analysis of Mouse Gonadal Development Involving Sexual Differentiation, Meiosis and Gametogenesis
Source: PubMed Central journal article supplement (PMC6794783; doi:10.1186/s12575-019-0108-y), 2019-10-15

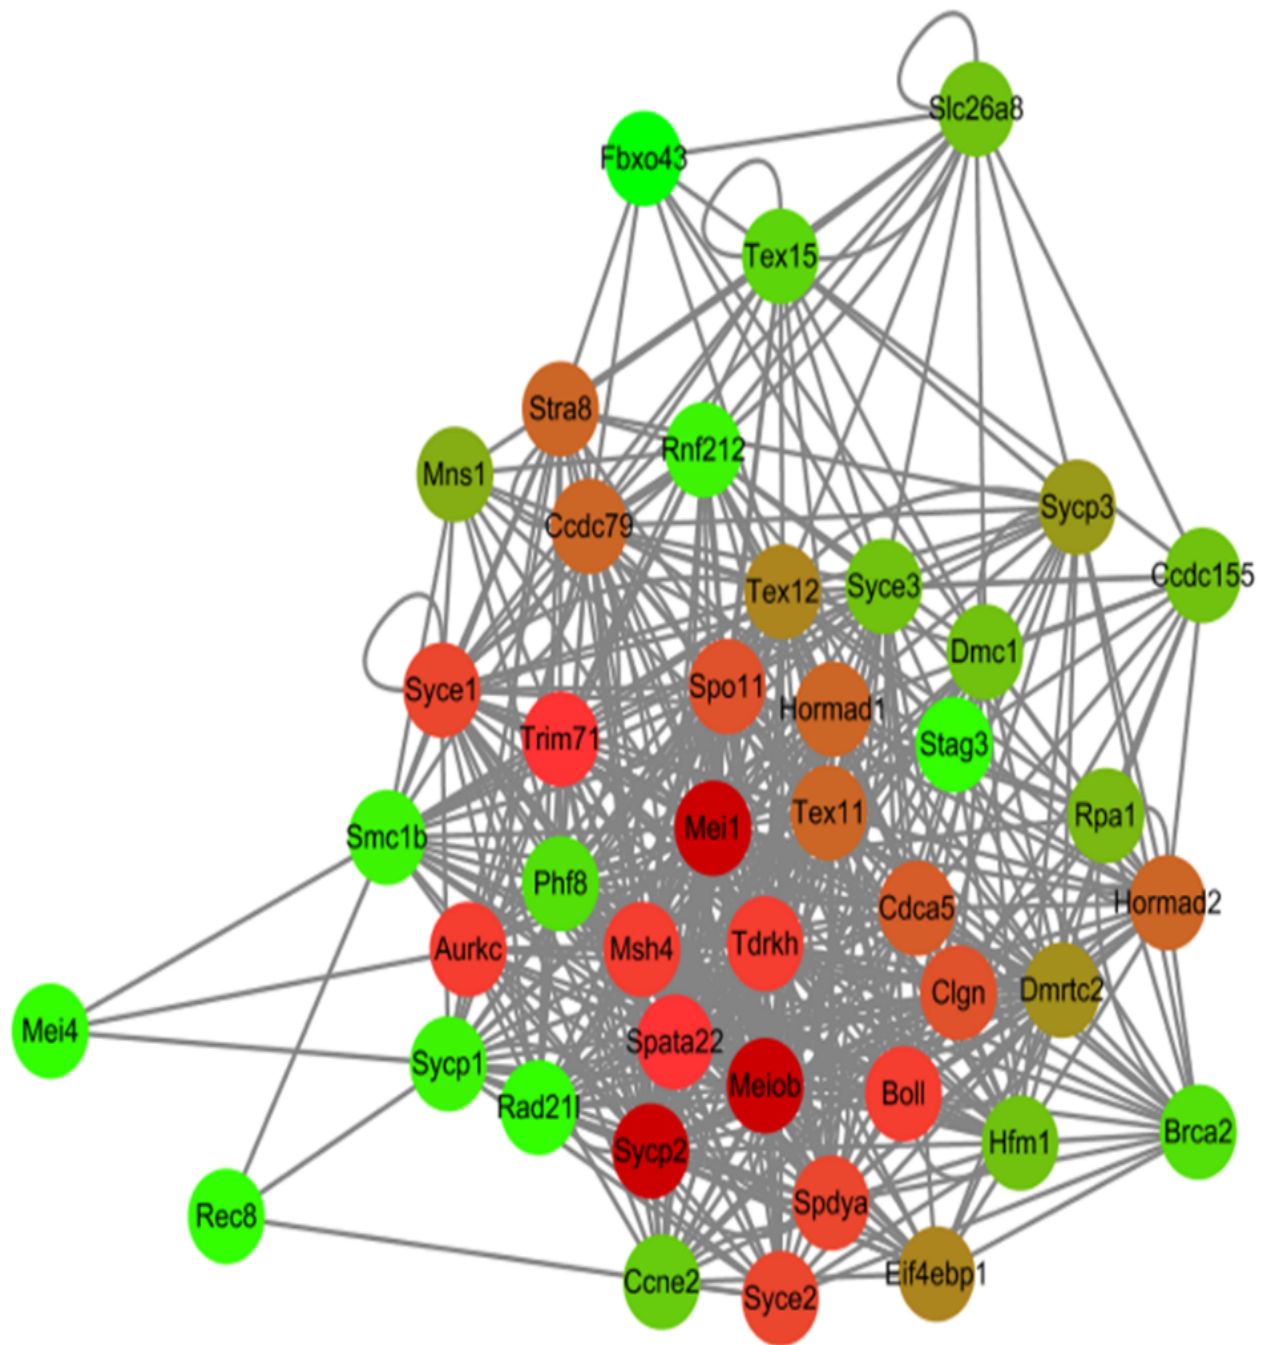

Supplement: 12575_2019_108_MOESM2_ESM.pdf [file 12575_2019_108_MOESM2_ESM.pdf]
